# Supplementary material for: A monotopic aluminum telluride with an Al=Te double bond stabilized by N-heterocyclic carbenes
Source: PubMed Central journal article supplement (PMC4674676; doi:10.1038/ncomms10037), 2015-11-27
Supplement: ncomms10037-s1.pdf [file ncomms10037-s1.pdf]

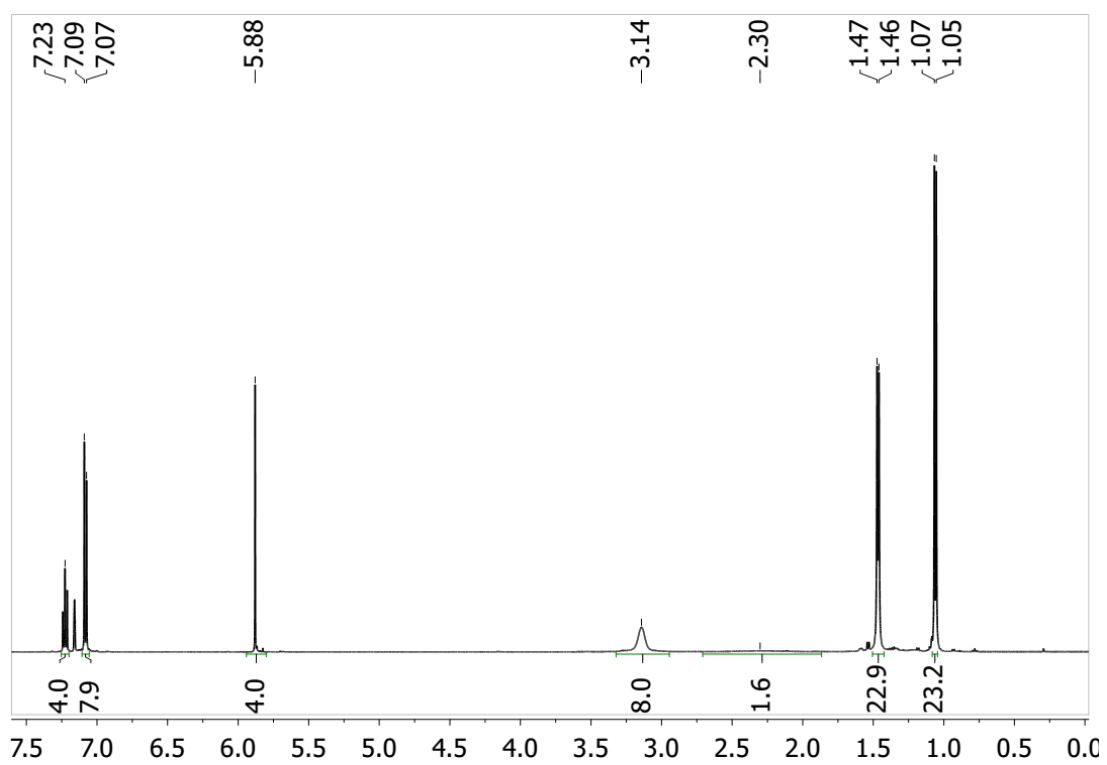

**Supplementary Figure 1.**  $^1\text{H}$  NMR spectrum (500.1 MHz) of **2** in  $\text{C}_6\text{D}_6$ .

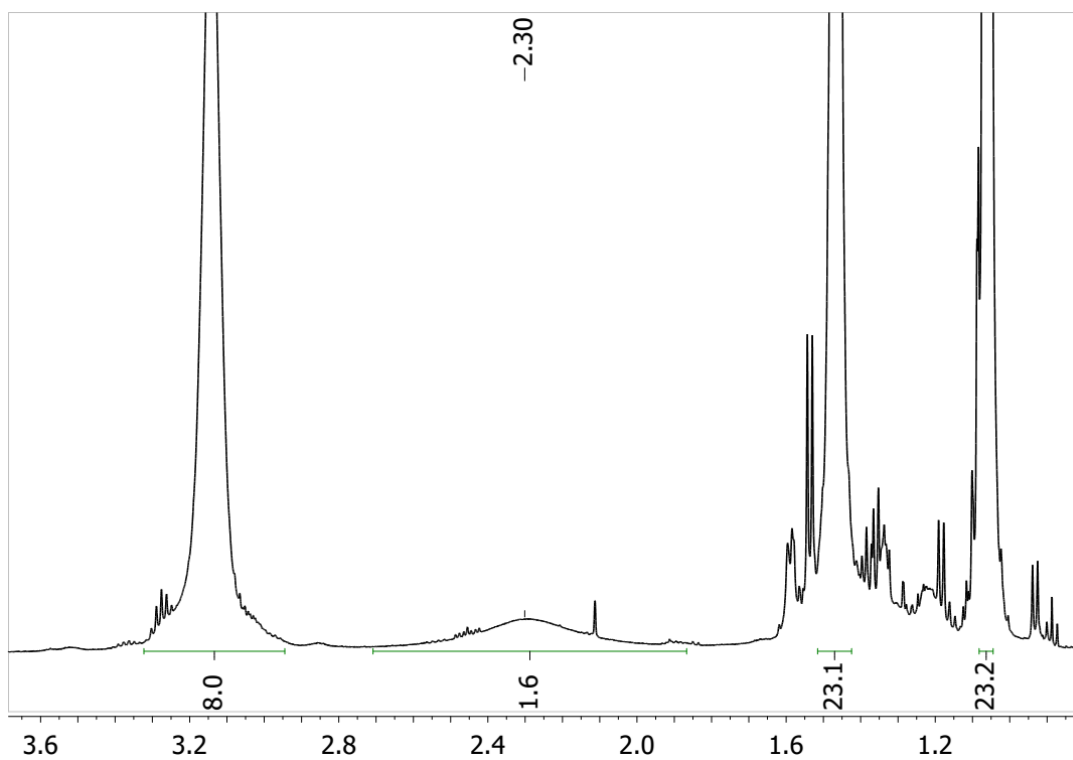

**Supplementary Figure 2.** Expansion of the high-field region of the spectrum in Supplementary Figure 1 showing the signal produced by the *AlH* hydrogen atoms of **2** at 2.30 ppm.

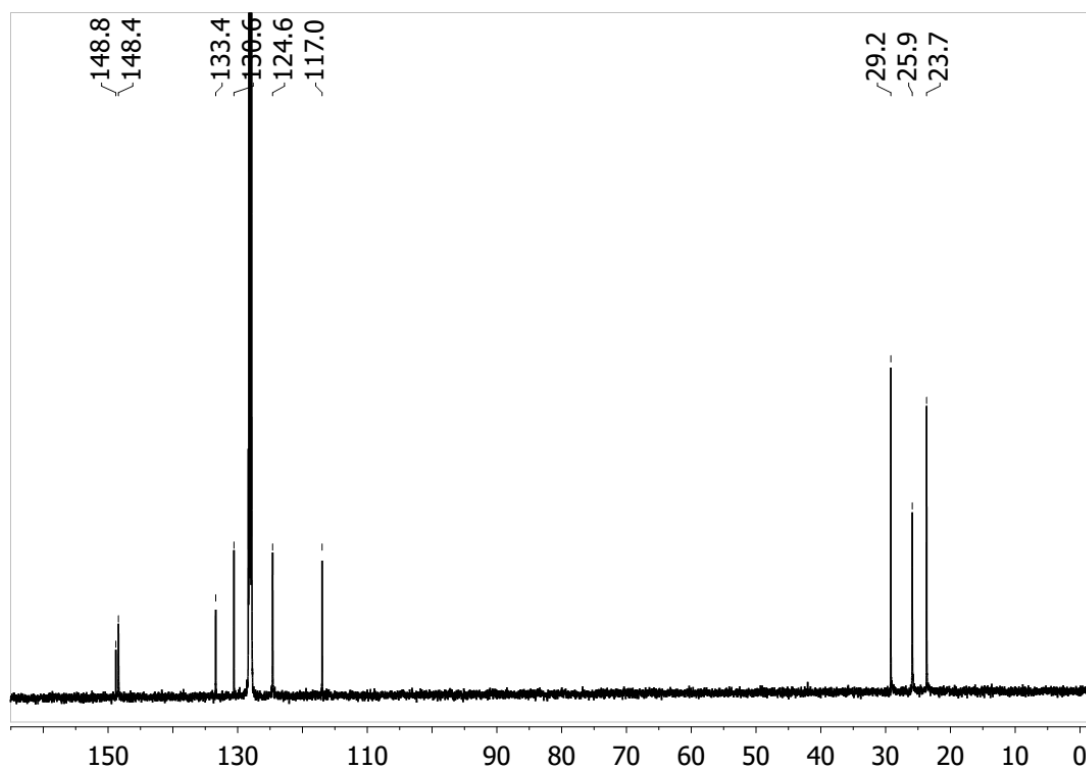

**Supplementary Figure 3.**  $^{13}\text{C}\{^1\text{H}\}$  NMR spectrum (125.8 MHz) of **2** in  $\text{C}_6\text{D}_6$ .

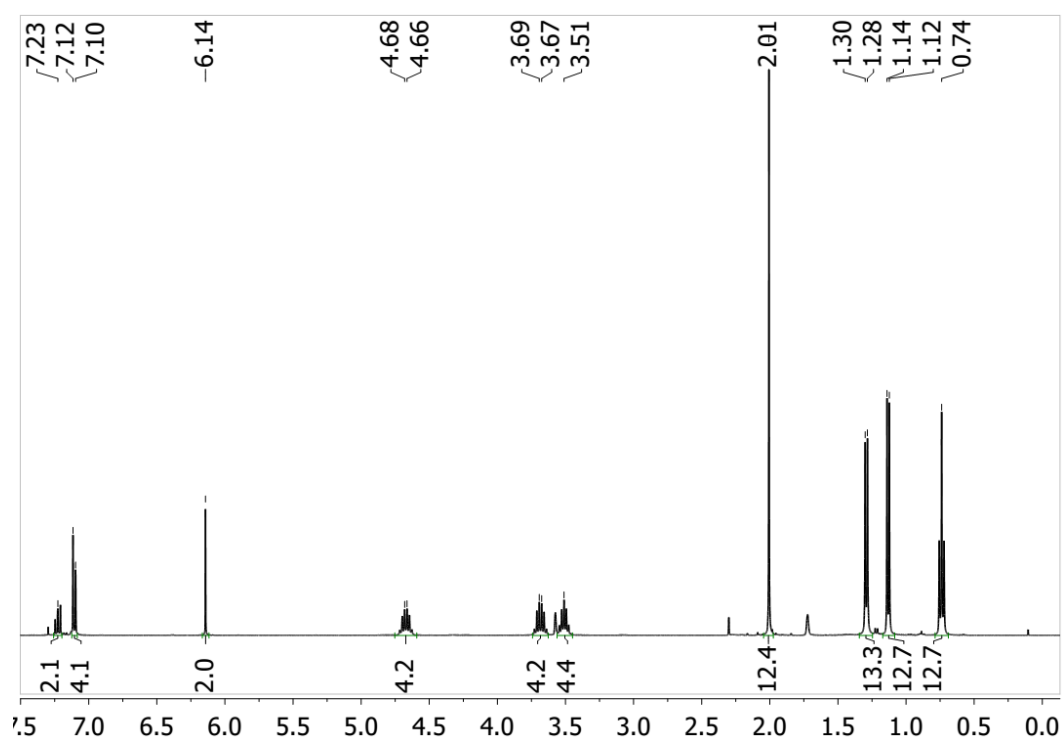

**Supplementary Figure 4.**  $^1\text{H}$  NMR spectrum (400.1 MHz) of **3** in  $\text{THF-}d_8$ .

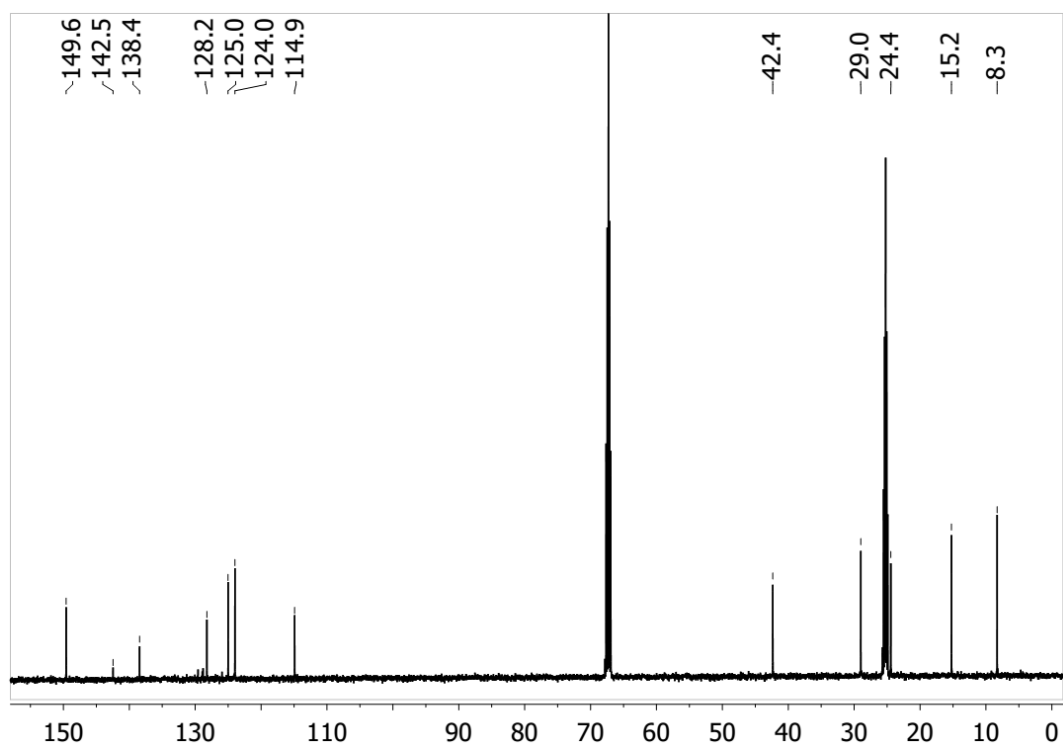

**Supplementary Figure 5.**  $^{13}\text{C}\{^1\text{H}\}$  NMR spectrum (125.8 MHz) of **3** in  $\text{THF-}d_8$ .

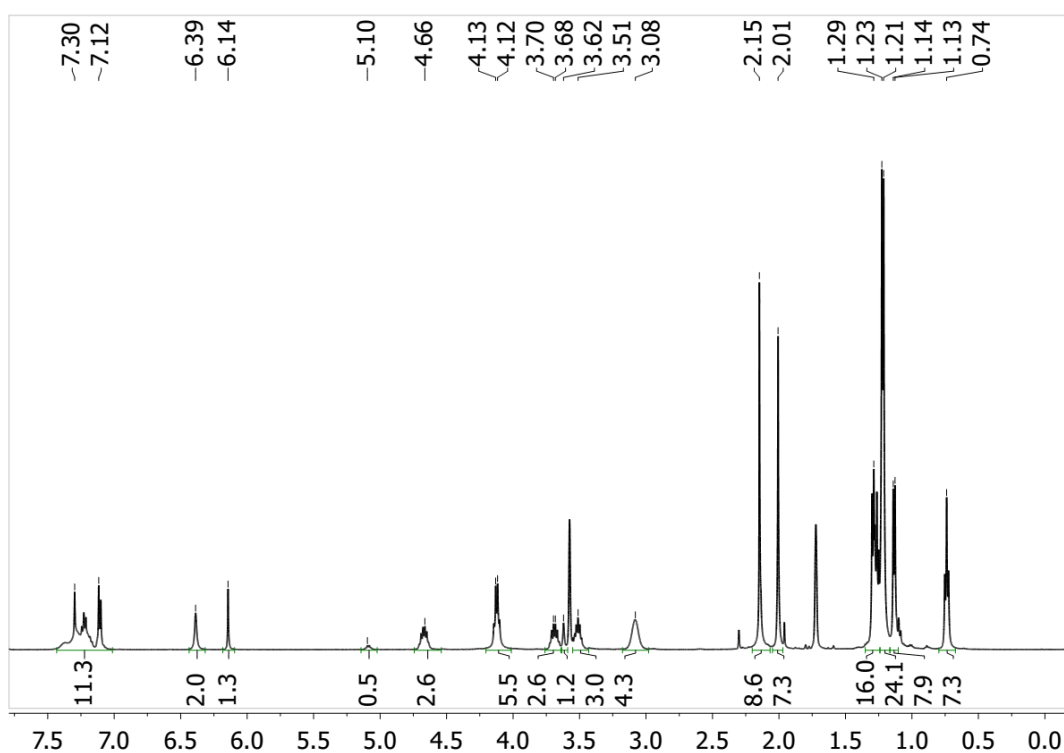

**Supplementary Figure 6.**  $^1\text{H}$  NMR spectrum (500.1 MHz) of **3** in  $\text{THF-}d_8$  after storage of a flame-sealed sample tube at ambient temperature for 4 days. The spectrum shows  $\text{L}^{\text{DipNH}}$  and **3** in a 2:1.3 ratio. Significant amounts of an off-white powder had separated from the solution.

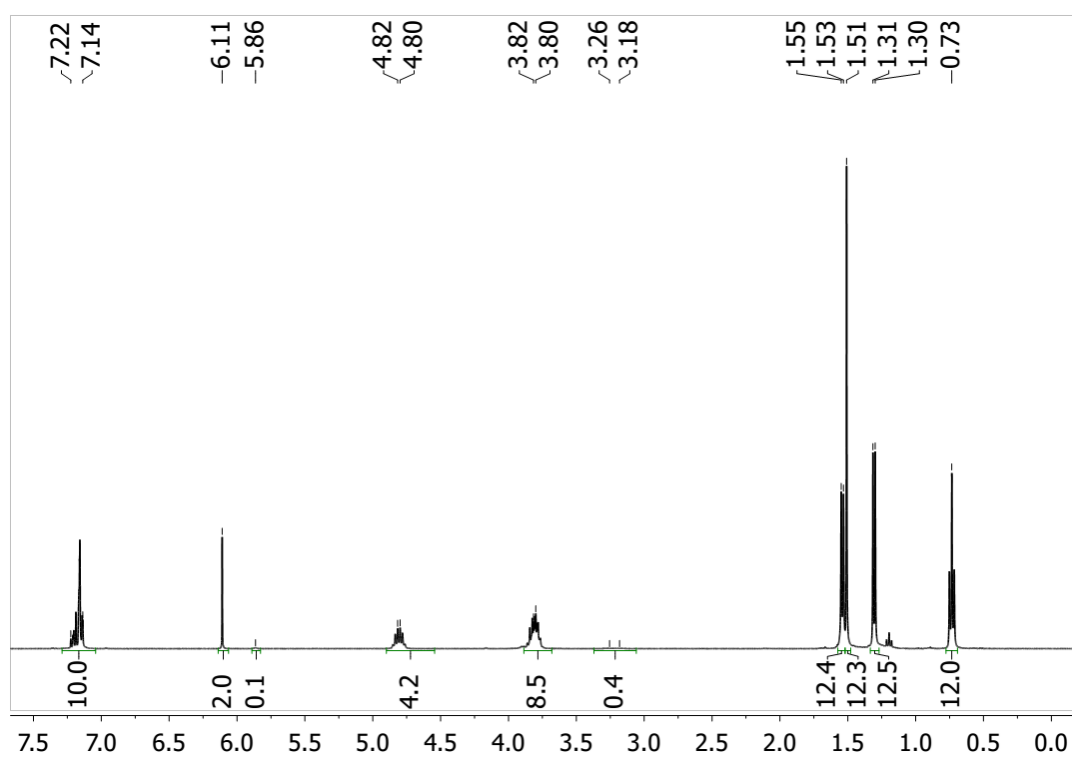

**Supplementary Figure 7.**  $^1\text{H}$  NMR spectrum (400.1 MHz) of **3** in  $\text{C}_6\text{D}_6$ . The spectrum shows trace amounts of  $\text{L}^{\text{Dip}}\text{NH}$  (selected resonances: 5.86 ppm, s, 0.1 H,  $\text{NCH}$  and 3.22 ppm, br, 0.4 H,  $\text{CH}(\text{CH}_3)_2$ ). Impurities are overestimated due to the poor solubility of **3** in  $\text{C}_6\text{D}_6$ .

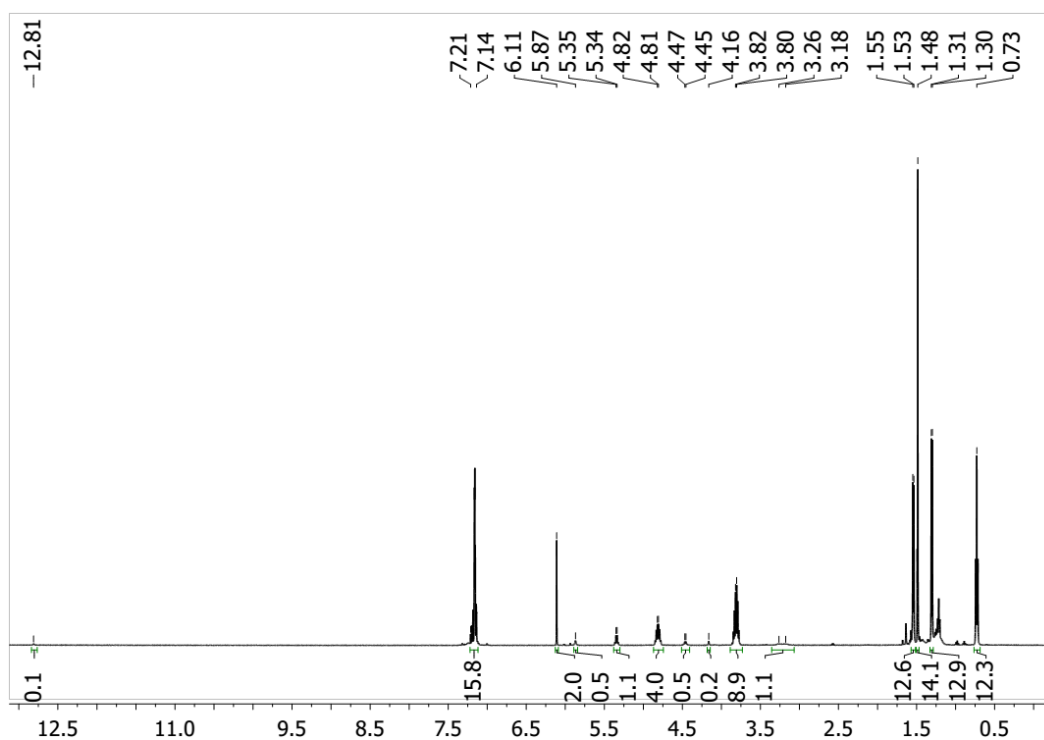

**Supplementary Figure 8.**  $^1\text{H}$  NMR spectrum (500.1 MHz) of **3** in  $\text{C}_6\text{D}_6$  after storage of the flame-sealed sample tube at ambient temperature for 10 days. The spectrum shows  $\text{L}^{\text{Dip}}\text{NH}$  (selected resonances: 5.87 ppm, s, 0.5 H,  $\text{NCH}$  and 3.22 ppm, br, 1.1 H,  $\text{CH}(\text{CH}_3)_2$ ) and additional decomposition products. Impurities may be overestimated due to the low solubility of **3** in  $\text{C}_6\text{D}_6$ .



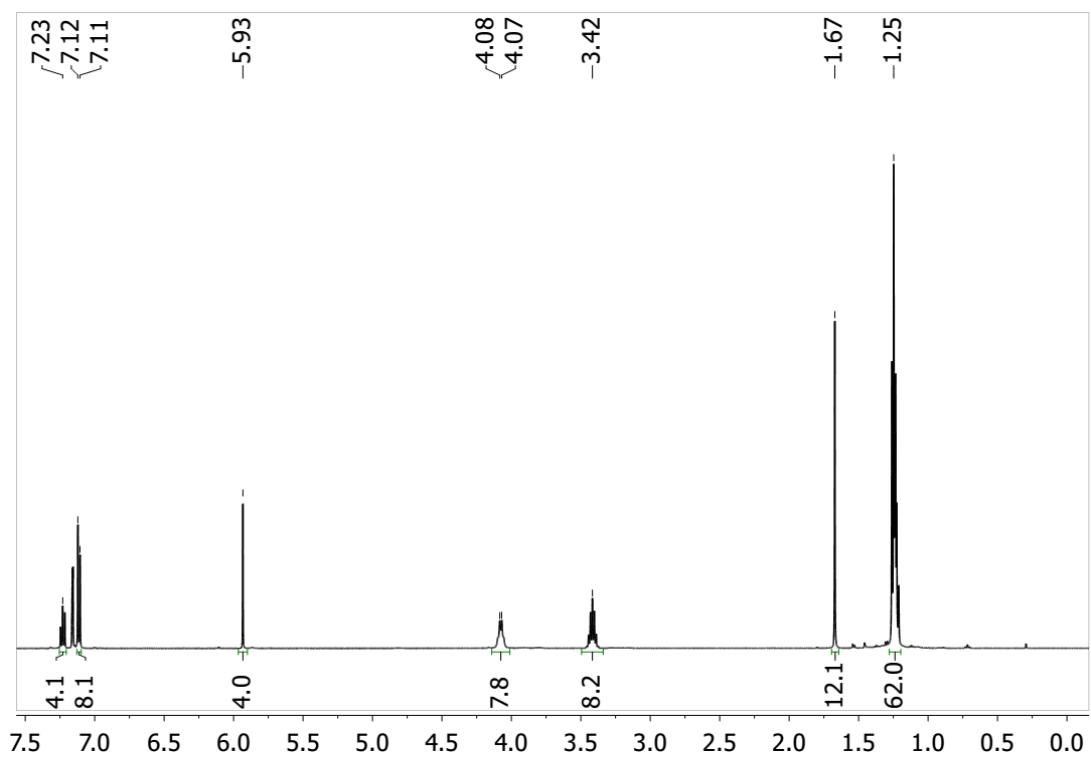

**Supplementary Figure 9.** <sup>1</sup>H NMR spectrum (500.1 MHz) of **5** in C<sub>6</sub>D<sub>6</sub>.

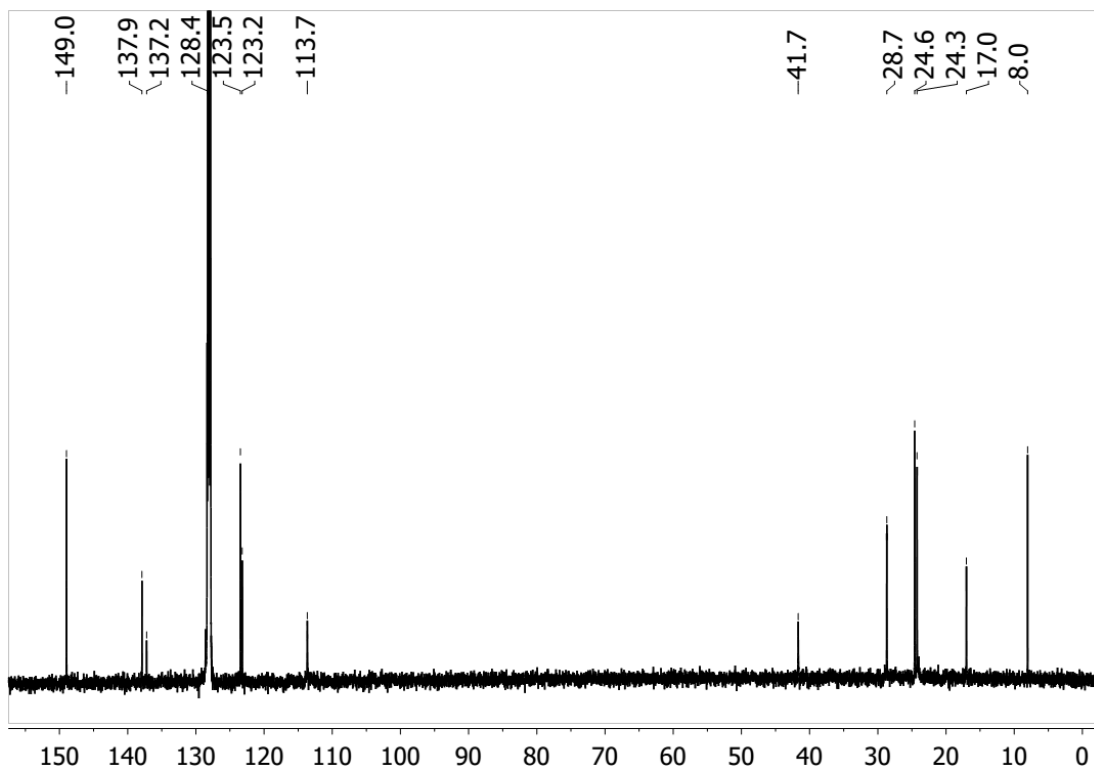

**Supplementary Figure 10.**  $^{13}\text{C}\{^1\text{H}\}$  NMR spectrum (125.8 MHz) of **5** in  $\text{C}_6\text{D}_6$ .

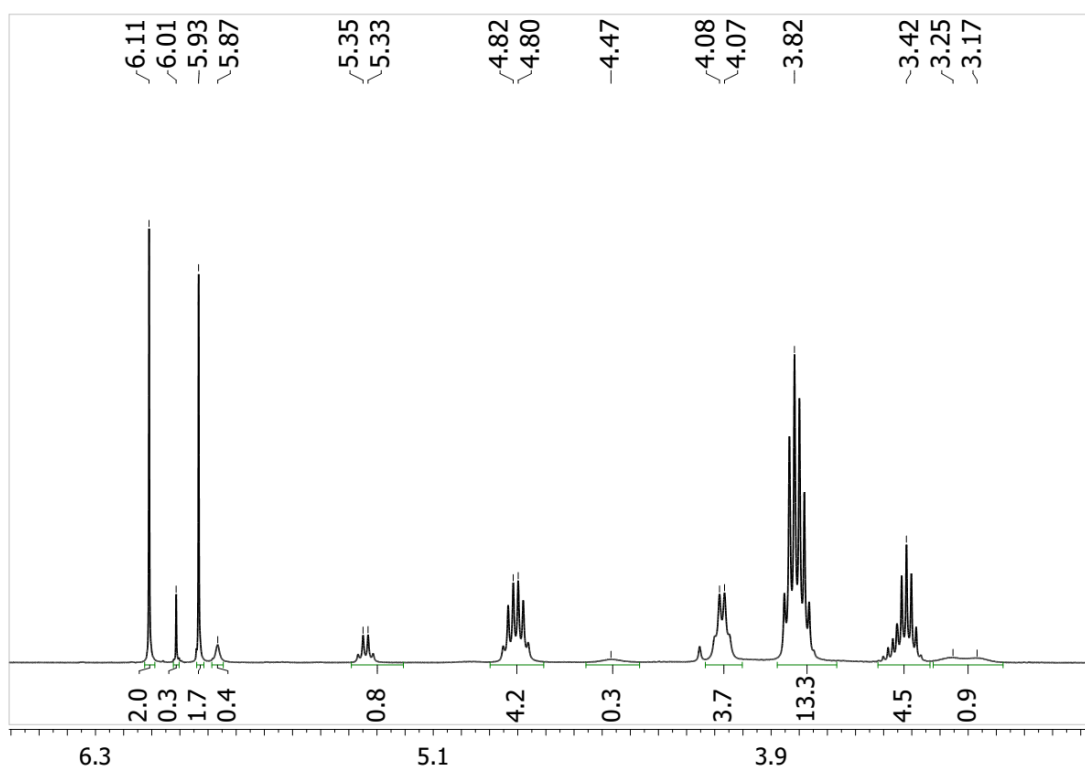

**Supplementary Figure 11.** Expansion of the  $^1\text{H}$  NMR spectrum (400.1 MHz) of **3** in  $\text{C}_6\text{D}_6$  after storage for 6 h at 80 °C (flame-sealed sample tube). From the singlets produced by the respective ligand backbones it is concluded on the presence of **3**, an unknown species, **5** and  $\text{L}^{\text{Dip}}\text{NH}$  in a 2.0:0.3:0.9:0.4 ratio in solution.

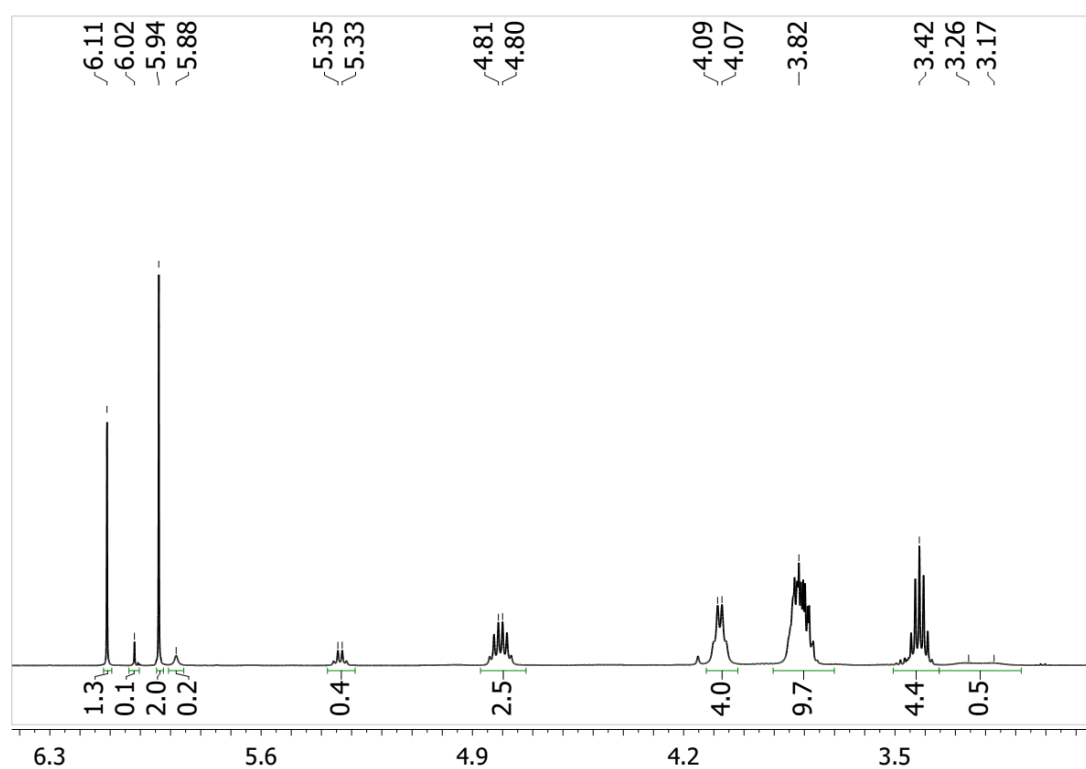

**Supplementary Figure 12.** Expansion of the  $^1\text{H}$  NMR spectrum (500.1 MHz) of **3** in  $\text{C}_6\text{D}_6$  after storage for 26 h at 80  $^\circ\text{C}$  (flame-sealed sample tube). From the singlets produced by the respective ligand backbones it is concluded on the presence of **3**, an unknown species, **5** and  $\text{L}^{\text{Dip}}\text{NH}$  in a 1.3:0.1:1.0:0.2 ratio in solution.

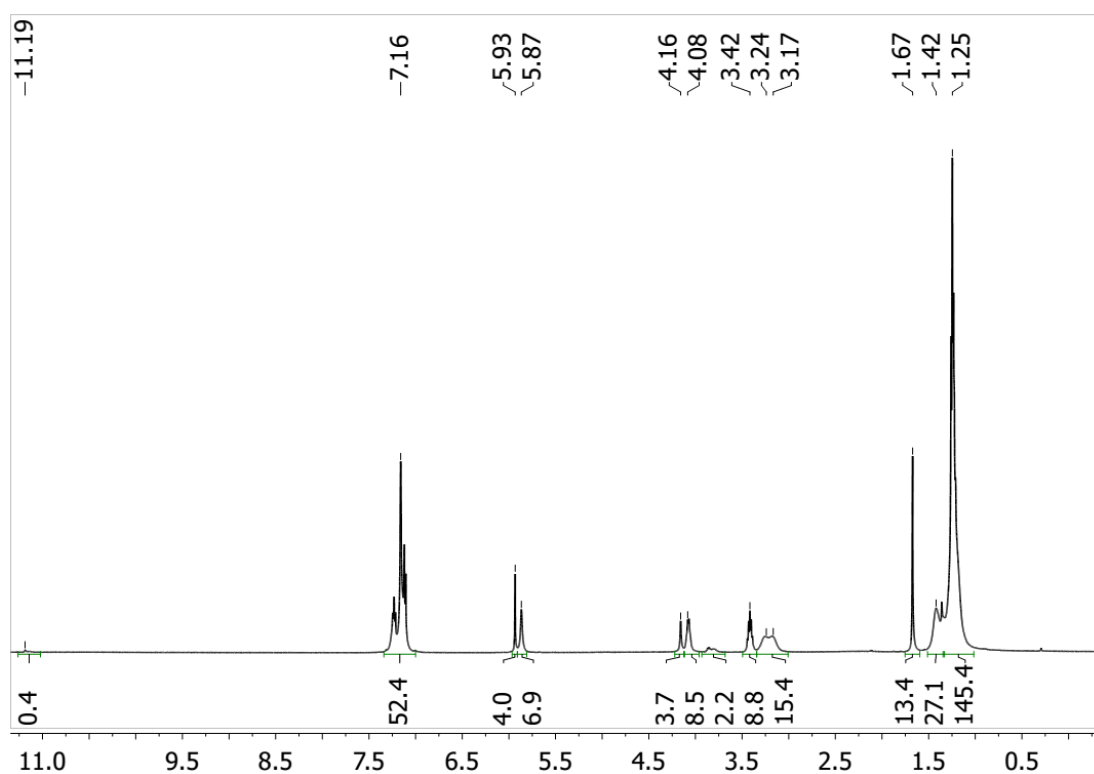

**Supplementary Figure 13.**  $^1\text{H}$  NMR spectrum (500.1 MHz) of **5** in  $\text{C}_6\text{D}_6$  after storage of the isolated solid product in the *Glove Box Workstation* at ambient temperature for 20h. The spectrum shows **5** and  $\text{L}^{\text{Dip}}\text{NH}$  in a 1:3.5 ratio, as well as putative trace amounts of  $[\text{L}^{\text{Et}}\text{H}]^+$ .

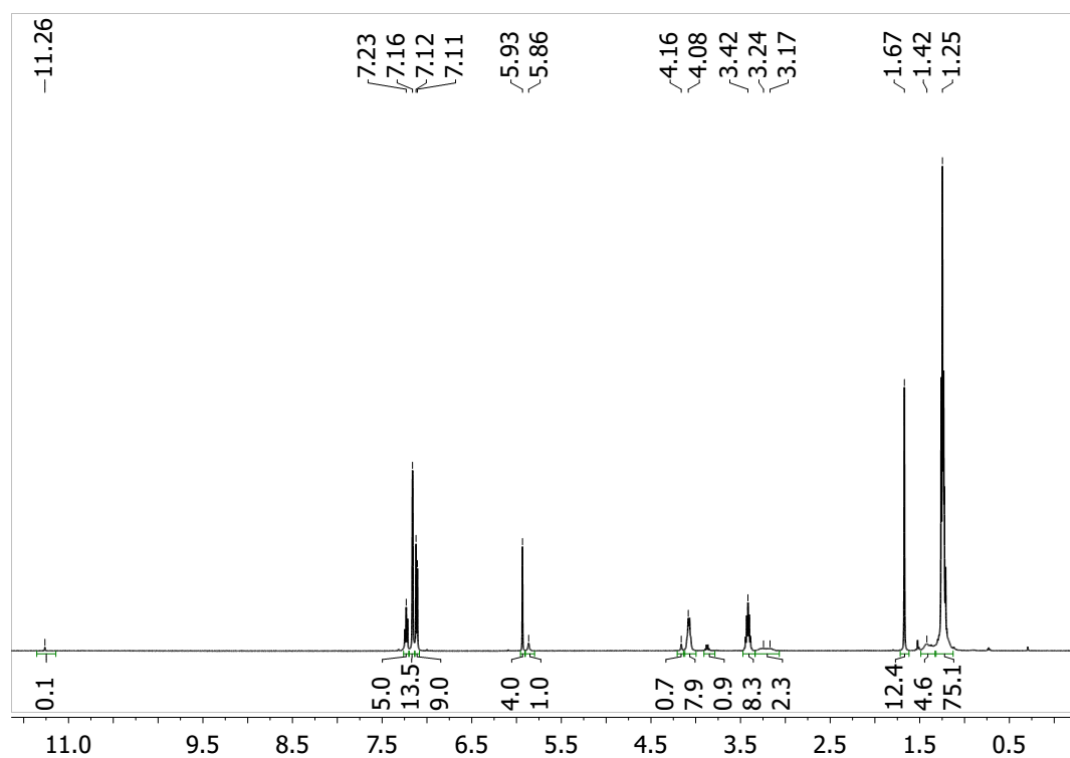

**Supplementary Figure 14.**  $^1\text{H}$  NMR spectrum (500.1 MHz) of **5** in  $\text{C}_6\text{D}_6$  after storage of the rubber capped sample tube at ambient temperature for 4 h. The spectrum shows **5** and  $\text{L}^{\text{Dip}}\text{NH}$  in a 1:0.5 ratio, as well as putative trace amounts of  $[\text{L}^{\text{Et}}\text{H}]^+$ .

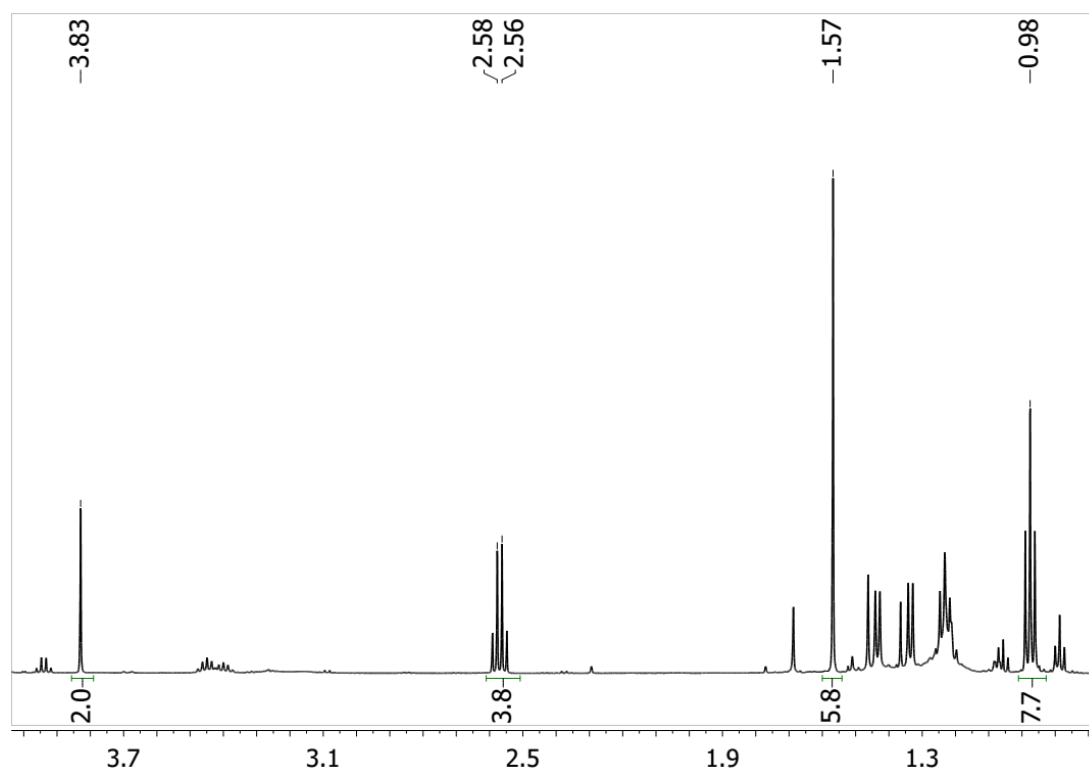

**Supplementary Figure 15.** <sup>1</sup>H NMR spectrum (500.1 MHz) of crude L<sup>Et</sup>(H<sub>2</sub>) in C<sub>6</sub>D<sub>6</sub> as derived from the reaction mixture of the synthesis of **3** after separation of **3** (high content of impurities).

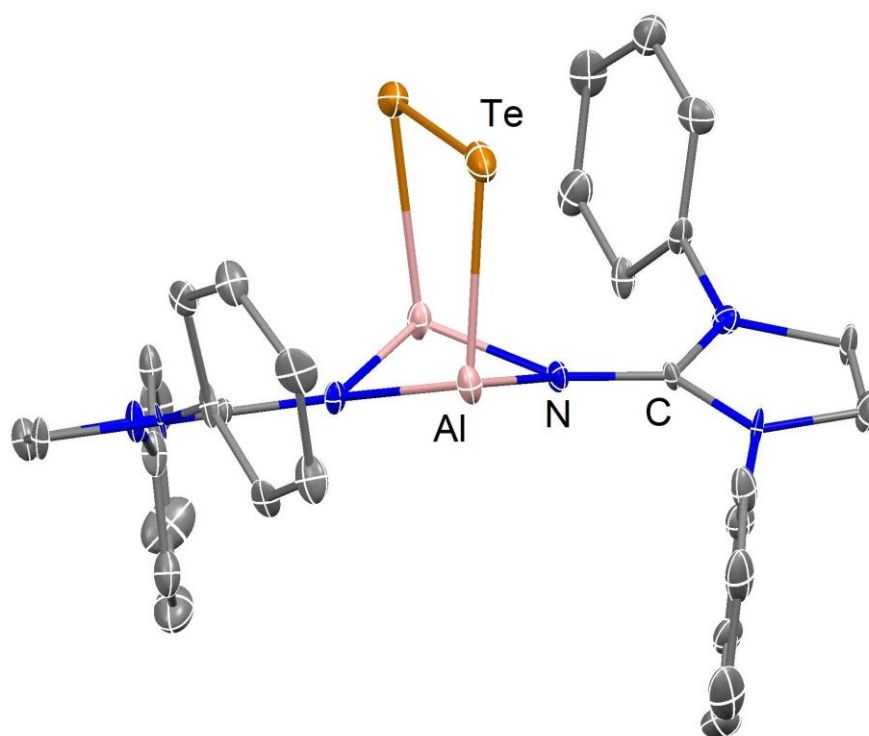

**Supplementary Figure 16.** Molecular structure of **2** in the solid state derived from single crystal X-ray diffraction analysis. Hydrogen atoms and isopropyl groups have been omitted. Thermal ellipsoids are at the 30% probability level. Structural parameters are not given due to the insufficient quality of the data (cf. Supplementary Table 6).



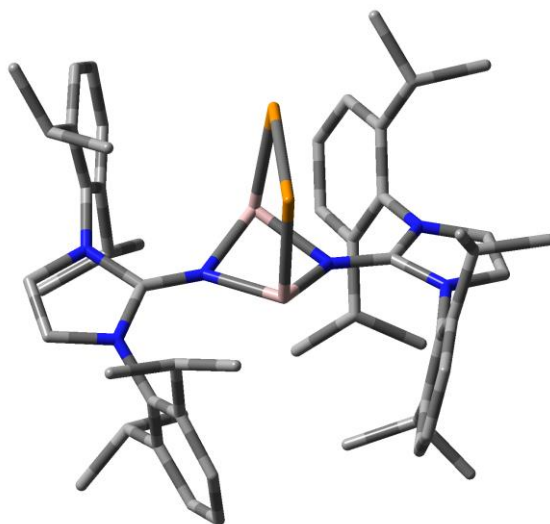

**Supplementary Figure 17.** Calculated molecular structure of **2** at B97-D/6-31G(d)[Al: cc-pVTZ, Te: cc-pVTZ-PP] level of theory (stick model). Te: yellow, Al: pink, N: blue, C: grey. Hydrogen atoms are omitted for clarity.

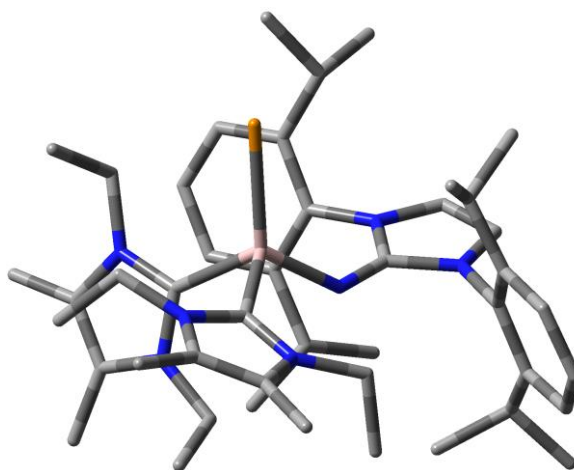

**Supplementary Figure 18.** Calculated molecular structure of **3** at B97-D/6-31G(d)[Al: cc-pVTZ, Te: cc-pVTZ-PP] level of theory (stick model). Te: yellow, Al: pink, N: blue, C: grey. Hydrogen atoms are omitted for clarity.

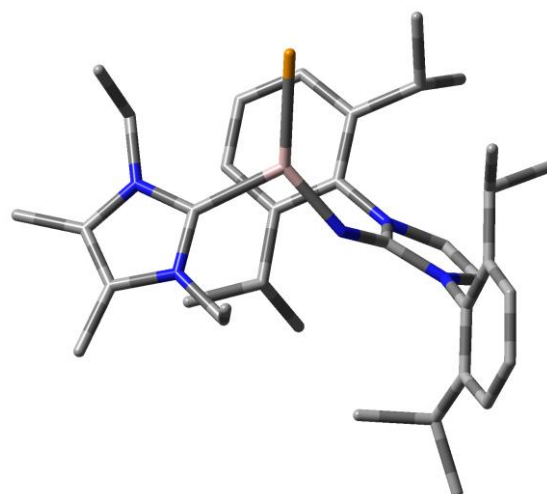

**Supplementary Figure 19.** Calculated molecular structure of **4** at B97-D/6-31G(d)[Al: cc-pVTZ, Te: cc-pVTZ-PP] level of theory (stick model). Te: yellow, Al: pink, N: blue, C: grey. Hydrogen atoms are omitted for clarity.

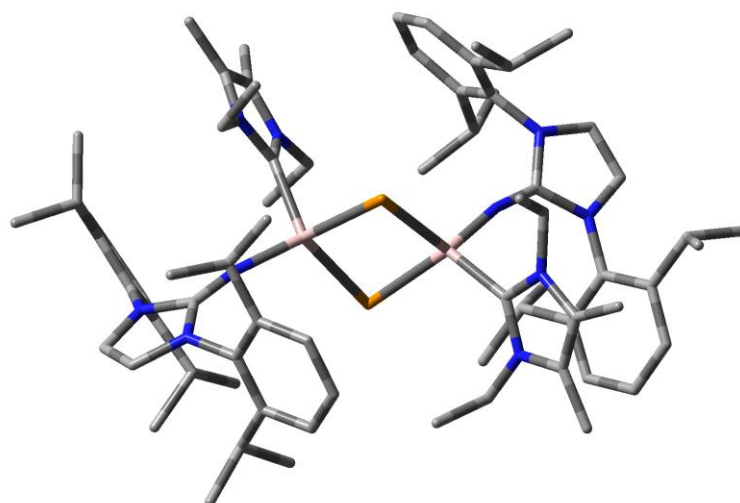

**Supplementary Figure 20.** Calculated molecular structure of **5** at B97-D/6-31G(d)[Al: cc-pVTZ, Te: cc-pVTZ-PP] level of theory (stick model). Te: yellow, Al: pink, N: blue, C: grey. Hydrogen atoms are omitted for clarity.

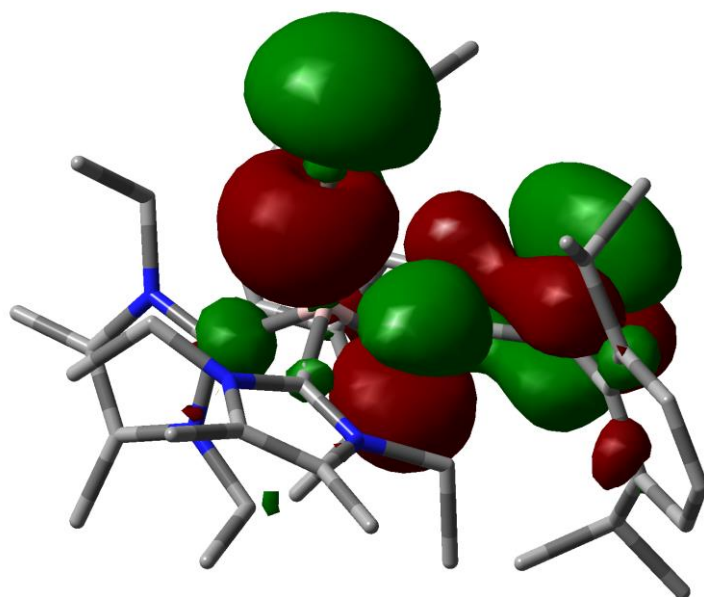

**Supplementary Figure 21.** HOMO-3 of **3** at B97-D/6-31G(d)[Al: cc-pVTZ, Te: cc-pVTZ-PP] level of theory (stick model). Te: yellow, Al: pink, N: blue, C: grey. Hydrogen atoms have been omitted for clarity.

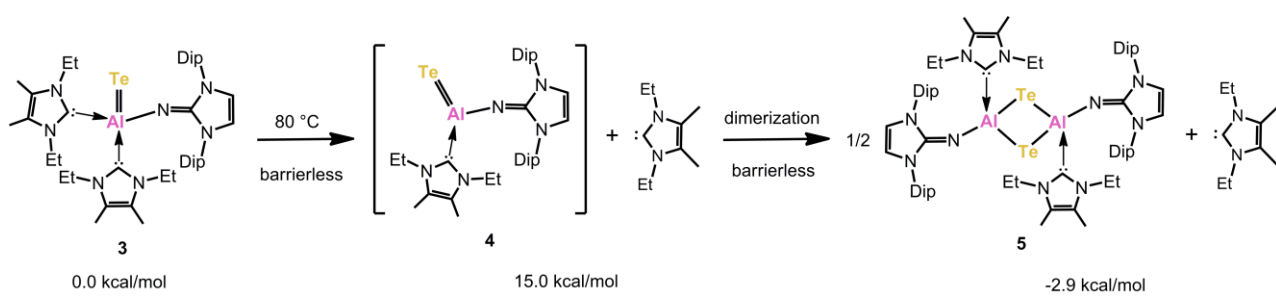

**Supplementary Figure 22.** Calculated mechanism of the reaction from **3** to **5** at  $\omega$ B97X-D/cc-pVTZ[Te: cc-pVTZ-PP](SMD=benzene)//B97-D/6-31G(d)[Al: cc-pVTZ, Te: cc-pVTZ-PP] level of theory.

## Supplementary Tables

**Supplementary Table 1.** Bond analyses to **3**, **4**, **5** and to selected sterically reduced model compounds ( $L^{\text{Me}}$  = 1,3,4,5-tetramethyl-imidazolin-2-ylidene).

|                                             | Al–Te bond length [Å] | Wiberg Bond Index | NPA charge Al | NPA charge Te | NRT                          |
|---------------------------------------------|-----------------------|-------------------|---------------|---------------|------------------------------|
| $[\text{Me}_3\text{AlTe}]^{2-}$             | 2.674                 | 0.94              | 1.40          | -1.35         | Al–Te: 100.0%                |
| $[\text{Me}_2\text{AlTe}]^-$                | 2.475                 | 1.41              | 1.26          | -1.02         | Al=Te: 100.0%                |
| $[\text{Me}_2(L^{\text{Me}})\text{AlTe}]^-$ | 2.562                 | 1.12              | 1.26          | -1.11         | Al=Te: 65.5%<br>Al–Te: 34.5% |
| $\text{Me}(L^{\text{Me}})_2\text{AlTe}$     | 2.508                 | 1.20              | 1.16          | -0.90         | Al=Te: 78.2%<br>Al–Te: 21.8% |
| $\text{Me}(L^{\text{Me}})\text{AlTe}$       | 2.422                 | 1.61              | 1.11          | -0.77         | Al≡Te: 8.9%<br>Al=Te: 91.1%  |
| $\text{MeAlTe}$                             | 2.355                 | 2.09              | 1.12          | -0.62         | Al≡Te: 100.0%                |
| <b>3</b>                                    | 2.505                 | 1.20              | 1.24          | -0.95         | Al=Te: 76.7%<br>Al–Te: 23.3% |
| <b>4</b>                                    | 2.428                 | 1.52              | 1.22          | -0.84         | Al≡Te: 5.1%<br>Al=Te: 94.9%  |
| <b>5</b>                                    | 2.657                 | 0.75              | 1.21          | -0.79         | Al–Te: 100.0%                |

**Supplementary Table 2.** Cartesian geometry of **2** at B97-D/6-31G(d)[Al: cc-pVTZ, Te: cc-pVTZ-PP] level of theory in [Å].

|    |           |           |           |
|----|-----------|-----------|-----------|
| C  | 3.464488  | 2.402522  | 0.972753  |
| C  | 3.572677  | 1.616934  | -0.198424 |
| C  | 3.654791  | 2.186979  | -1.495108 |
| C  | 3.559932  | 3.588535  | -1.583971 |
| C  | 3.404619  | 4.384891  | -0.441274 |
| C  | 3.372429  | 3.796970  | 0.825459  |
| N  | 3.616691  | 0.184600  | -0.040267 |
| C  | 2.506641  | -0.604577 | 0.281203  |
| N  | 3.049724  | -1.826970 | 0.678093  |
| C  | 4.447989  | -1.756527 | 0.667929  |
| C  | 4.795827  | -0.517527 | 0.241594  |
| N  | 1.244626  | -0.268188 | 0.275031  |
| Al | -0.373836 | -1.333052 | 0.138188  |
| C  | 2.324906  | -2.926451 | 1.262741  |
| C  | 1.888532  | -2.811876 | 2.607601  |
| C  | 1.249196  | -3.923812 | 3.180779  |
| C  | 1.044128  | -5.097699 | 2.445375  |
| C  | 1.470260  | -5.178529 | 1.116479  |
| C  | 2.118044  | -4.095396 | 0.491645  |
| C  | 2.107289  | -1.528991 | 3.411118  |
| C  | 3.537678  | -1.471378 | 3.998166  |
| C  | 2.583514  | -4.207175 | -0.959566 |
| C  | 1.638020  | -5.069379 | -1.824969 |
| C  | 3.889872  | 1.329680  | -2.740257 |
| C  | 3.482247  | 2.025558  | -4.055140 |
| C  | 3.448370  | 1.797224  | 2.372802  |
| C  | 2.105408  | 2.070154  | 3.079353  |
| C  | 1.076587  | -1.331506 | 4.540331  |
| C  | 4.016484  | -4.790162 | -1.038027 |
| C  | 5.379821  | 0.914750  | -2.851120 |
| C  | 4.634546  | 2.318619  | 3.215741  |
| Al | 0.309443  | 1.268695  | -0.376096 |
| N  | -1.276680 | 0.366487  | 0.311412  |
| C  | -2.510958 | 0.785521  | 0.408412  |
| N  | -2.929788 | 2.110269  | 0.567742  |
| C  | -4.324779 | 2.165961  | 0.672919  |
| C  | -4.794912 | 0.899283  | 0.560165  |
| N  | -3.694917 | 0.048644  | 0.395976  |
| C  | -2.084565 | 3.159533  | 1.072814  |
| C  | -1.587716 | 4.134890  | 0.180807  |
| C  | -0.798186 | 5.164318  | 0.721517  |
| C  | -0.487833 | 5.192122  | 2.087056  |
| C  | -0.975849 | 4.197751  | 2.944457  |
| C  | -1.799048 | 3.166779  | 2.457288  |



|   |           |           |           |
|---|-----------|-----------|-----------|
| C | -1.881941 | 4.048413  | -1.314102 |
| C | -3.215351 | 4.756208  | -1.651904 |
| C | -2.342710 | 2.102122  | 3.408076  |
| C | -3.097742 | 2.733426  | 4.599355  |
| C | -3.795257 | -1.367053 | 0.171203  |
| C | -4.288714 | -1.819134 | -1.080059 |
| C | -4.314816 | -3.209012 | -1.288527 |
| C | -3.897155 | -4.099623 | -0.290911 |
| C | -3.479132 | -3.623942 | 0.956320  |
| C | -3.427115 | -2.243113 | 1.221676  |
| C | -4.815177 | -0.838483 | -2.135040 |
| C | -3.686523 | -0.051752 | -2.837673 |
| C | -3.041422 | -1.700450 | 2.601755  |
| C | -4.278586 | -1.126185 | 3.337010  |
| C | -5.718651 | -1.503543 | -3.194254 |
| C | -2.362696 | -2.739881 | 3.514111  |
| C | -1.212573 | 1.174971  | 3.901348  |
| C | -0.737456 | 4.599458  | -2.189563 |
| H | 6.023523  | 1.809677  | -2.893138 |
| H | 3.599053  | 4.064604  | -2.563095 |
| H | 3.314625  | 5.468680  | -0.544034 |
| H | 3.257340  | 4.417540  | 1.715921  |
| H | 5.596183  | 2.098445  | 2.724784  |
| H | 4.630342  | 1.837743  | 4.207958  |
| H | 4.566100  | 3.408741  | 3.363103  |
| H | 4.750231  | -4.152235 | -0.524456 |
| H | 4.325286  | -4.885412 | -2.092200 |
| H | 4.045346  | -5.792126 | -0.577466 |
| H | 5.046579  | -2.601556 | 0.981070  |
| H | 1.741873  | -6.141840 | -1.586845 |
| H | 1.890167  | -4.931177 | -2.887038 |
| H | 3.516973  | 1.292860  | -4.875483 |
| H | 4.179359  | 2.845179  | -4.302088 |
| H | 5.533970  | 0.337116  | -3.777554 |
| H | 5.703342  | 0.290389  | -2.008141 |
| H | 5.763031  | -0.048037 | 0.119571  |
| H | 1.289217  | -6.090729 | 0.547881  |
| H | 0.540018  | -5.948835 | 2.908886  |
| H | 0.893742  | -3.868292 | 4.209213  |
| H | 2.589575  | -3.195646 | -1.391957 |
| H | 0.587037  | -4.778616 | -1.680943 |
| H | 1.982995  | -0.683521 | 2.722998  |
| H | 1.191937  | -0.322946 | 4.964815  |
| H | 1.226215  | -2.057785 | 5.356630  |
| H | 0.050685  | -1.434684 | 4.162841  |
| H | 4.304340  | -1.512318 | 3.211165  |
| H | 3.698460  | -2.315255 | 4.689673  |
| H | 3.673939  | -0.532102 | 4.559718  |

|    |           |           |           |
|----|-----------|-----------|-----------|
| H  | 3.278628  | 0.420246  | -2.636997 |
| H  | 2.460377  | 2.425951  | -4.001089 |
| H  | 3.568088  | 0.710189  | 2.294381  |
| H  | 1.271040  | 1.653817  | 2.501140  |
| H  | 1.928849  | 3.151332  | 3.191600  |
| H  | 2.105317  | 1.608838  | 4.080466  |
| H  | -4.828621 | 3.108726  | 0.844162  |
| H  | -5.801695 | 0.501828  | 0.575615  |
| H  | -0.724018 | 4.220682  | 4.006424  |
| H  | 0.145416  | 5.989270  | 2.483902  |
| H  | -0.388152 | 5.926713  | 0.058939  |
| H  | -3.066034 | 1.475879  | 2.869838  |
| H  | -0.711431 | 0.690821  | 3.051571  |
| H  | -0.459420 | 1.743064  | 4.469509  |
| H  | -1.625071 | 0.391591  | 4.557570  |
| H  | -3.911346 | 3.389189  | 4.249980  |
| H  | -3.532374 | 1.939869  | 5.228953  |
| H  | -2.419584 | 3.333040  | 5.228200  |
| H  | -1.998208 | 2.983312  | -1.570879 |
| H  | -0.926893 | 4.332639  | -3.240892 |
| H  | -0.674095 | 5.699275  | -2.124553 |
| H  | 0.230355  | 4.173166  | -1.885135 |
| H  | -4.057509 | 4.305906  | -1.103738 |
| H  | -3.160357 | 5.825993  | -1.387948 |
| H  | -3.423216 | 4.674167  | -2.731449 |
| H  | -3.172507 | -4.331354 | 1.725543  |
| H  | -3.910517 | -5.174481 | -0.484802 |
| H  | -4.659700 | -3.602542 | -2.243587 |
| H  | -2.325215 | -0.879441 | 2.449870  |
| H  | -1.478178 | -3.178856 | 3.032278  |
| H  | -2.049502 | -2.249976 | 4.449633  |
| H  | -3.064837 | -3.547485 | 3.782199  |
| H  | -3.972703 | -0.720148 | 4.315877  |
| H  | -4.763383 | -0.319154 | 2.771116  |
| H  | -5.019421 | -1.923852 | 3.513064  |
| H  | -5.441092 | -0.100261 | -1.607681 |
| H  | -6.532849 | -2.086507 | -2.733282 |
| H  | -6.162724 | -0.723193 | -3.831910 |
| H  | -5.136369 | -2.174680 | -3.846503 |
| H  | -3.014951 | 0.449277  | -2.129573 |
| H  | -3.066066 | -0.730315 | -3.439336 |
| H  | -4.126721 | 0.712928  | -3.499424 |
| Te | -0.336539 | -1.918433 | -2.440138 |
| Te | 0.045896  | 0.825104  | -2.974476 |
| H  | -0.637769 | -2.494463 | 1.167209  |
| H  | 0.721312  | 2.724505  | 0.050007  |

**Supplementary Table 3.** Cartesian geometry of **3** at B97-D/6-31G(d)[Al: cc-pVTZ, Te: cc-pVTZ-PP] level of theory in [Å].

|    |           |           |           |
|----|-----------|-----------|-----------|
| Te | -0.981817 | 0.861783  | -3.013694 |
| Al | -0.492295 | 0.722742  | -0.561186 |
| N  | 0.777019  | -0.365817 | 0.177041  |
| N  | 0.489113  | -2.765905 | -0.260469 |
| N  | 2.542295  | -1.937807 | -0.259847 |
| N  | -3.376686 | 0.128954  | 0.561372  |
| N  | -2.023120 | 0.763729  | 2.115059  |
| N  | -0.753637 | 3.781910  | -0.173143 |
| N  | 1.275615  | 3.187304  | 0.256916  |
| C  | 1.197277  | -1.541708 | -0.087473 |
| C  | 1.380808  | -3.815947 | -0.516557 |
| H  | 1.029197  | -4.831715 | -0.638609 |
| C  | 2.640469  | -3.308308 | -0.511641 |
| H  | 3.601208  | -3.781232 | -0.677724 |
| C  | -0.906711 | -2.967859 | -0.006355 |
| C  | -1.764986 | -3.295484 | -1.087523 |
| C  | -3.109209 | -3.596043 | -0.791128 |
| H  | -3.783991 | -3.859553 | -1.606089 |
| C  | -3.594320 | -3.541097 | 0.518673  |
| H  | -4.641565 | -3.777787 | 0.725239  |
| C  | -2.736072 | -3.189158 | 1.569450  |
| H  | -3.126608 | -3.150350 | 2.586015  |
| C  | -1.376791 | -2.914607 | 1.335728  |
| C  | -1.268334 | -3.368360 | -2.531592 |
| H  | -0.353660 | -2.761126 | -2.601542 |
| C  | -2.280913 | -2.792121 | -3.545607 |
| H  | -2.544904 | -1.755830 | -3.291799 |
| H  | -3.190821 | -3.414543 | -3.607377 |
| H  | -1.817518 | -2.777729 | -4.544542 |
| C  | -0.944306 | -4.831307 | -2.927086 |
| H  | -0.177169 | -5.284765 | -2.282884 |
| H  | -0.581024 | -4.864447 | -3.967486 |
| H  | -1.854713 | -5.451343 | -2.861242 |
| C  | -0.420295 | -2.627423 | 2.496033  |
| H  | 0.203101  | -1.772668 | 2.199849  |
| C  | -1.133187 | -2.249544 | 3.809574  |
| H  | -1.888544 | -1.469598 | 3.646813  |
| H  | -0.389201 | -1.885665 | 4.536535  |
| H  | -1.637239 | -3.122708 | 4.257487  |
| C  | 0.505599  | -3.837978 | 2.774716  |
| H  | 1.168168  | -3.610759 | 3.626394  |
| H  | 1.134056  | -4.087286 | 1.910124  |
| H  | -0.098970 | -4.722726 | 3.036882  |
| C  | 3.659957  | -1.054469 | -0.128739 |

|   |           |           |           |
|---|-----------|-----------|-----------|
| C | 3.960275  | -0.162237 | -1.186669 |
| C | 5.101547  | 0.650260  | -1.043119 |
| H | 5.361211  | 1.346719  | -1.840994 |
| C | 5.901320  | 0.583005  | 0.105708  |
| H | 6.787850  | 1.216613  | 0.190246  |
| C | 5.559496  | -0.281344 | 1.154649  |
| H | 6.173676  | -0.306695 | 2.055949  |
| C | 4.425042  | -1.109044 | 1.061957  |
| C | 3.055588  | -0.073149 | -2.412898 |
| H | 2.012959  | -0.158934 | -2.071836 |
| C | 3.316902  | -1.242442 | -3.391235 |
| H | 3.203330  | -2.217080 | -2.892485 |
| H | 4.335840  | -1.178261 | -3.811304 |
| H | 2.589313  | -1.189301 | -4.216986 |
| C | 3.144729  | 1.272982  | -3.156116 |
| H | 3.011087  | 2.118780  | -2.462405 |
| H | 2.328416  | 1.317264  | -3.891890 |
| H | 4.109964  | 1.391508  | -3.679635 |
| C | 3.954335  | -1.949623 | 2.250293  |
| H | 3.424826  | -2.832967 | 1.865540  |
| C | 2.931623  | -1.123851 | 3.070064  |
| H | 2.483435  | -1.746766 | 3.862186  |
| H | 2.134229  | -0.739801 | 2.416664  |
| H | 3.434685  | -0.264823 | 3.544261  |
| C | 5.095146  | -2.453883 | 3.156623  |
| H | 5.857410  | -3.000773 | 2.578658  |
| H | 4.684743  | -3.129901 | 3.924054  |
| H | 5.591815  | -1.620913 | 3.681091  |
| C | -2.092215 | 0.527629  | 0.768322  |
| C | -4.106540 | 0.108118  | 1.749142  |
| C | -3.250147 | 0.523346  | 2.740598  |
| C | -5.523291 | -0.365012 | 1.829786  |
| H | -5.862418 | -0.362298 | 2.875697  |
| H | -5.609600 | -1.394145 | 1.442458  |
| H | -6.209180 | 0.268802  | 1.244168  |
| C | -3.488692 | 0.713490  | 4.207042  |
| H | -4.464330 | 0.288278  | 4.483265  |
| H | -3.491182 | 1.779740  | 4.491678  |
| H | -2.717177 | 0.211684  | 4.813736  |
| C | -3.935767 | -0.246049 | -0.751986 |
| H | -4.519551 | -1.163576 | -0.601936 |
| H | -3.084694 | -0.467717 | -1.410869 |
| C | -4.777377 | 0.877394  | -1.366053 |
| H | -5.220704 | 0.517203  | -2.307173 |
| H | -4.131551 | 1.731604  | -1.610645 |
| H | -5.588799 | 1.203493  | -0.694828 |
| C | -0.789988 | 1.136134  | 2.828160  |
| H | 0.044757  | 0.883737  | 2.163293  |

|   |           |          |           |
|---|-----------|----------|-----------|
| H | -0.717359 | 0.484298 | 3.710957  |
| C | -0.757831 | 2.613005 | 3.244718  |
| H | 0.186173  | 2.818791 | 3.773140  |
| H | -1.592253 | 2.855957 | 3.920544  |
| H | -0.814110 | 3.267037 | 2.365904  |
| C | 0.044964  | 2.674572 | -0.044525 |
| C | -0.032438 | 4.961542 | 0.018574  |
| C | 1.259172  | 4.584775 | 0.291604  |
| C | -0.638613 | 6.323573 | -0.116897 |
| H | 0.122924  | 7.093200 | 0.073823  |
| H | -1.466940 | 6.479053 | 0.595090  |
| H | -1.041359 | 6.487944 | -1.131203 |
| C | 2.478910  | 5.420069 | 0.528312  |
| H | 2.247633  | 6.479270 | 0.344911  |
| H | 3.298155  | 5.129025 | -0.150483 |
| H | 2.859715  | 5.328440 | 1.559610  |
| C | -2.164514 | 3.741889 | -0.583272 |
| H | -2.294837 | 2.813005 | -1.160062 |
| H | -2.324944 | 4.574856 | -1.283538 |
| C | -3.137119 | 3.837589 | 0.600724  |
| H | -4.171371 | 3.837403 | 0.221432  |
| H | -2.979398 | 4.764818 | 1.175853  |
| H | -3.017166 | 2.982241 | 1.278304  |
| C | 2.481670  | 2.373433 | 0.483064  |
| H | 3.295720  | 2.800485 | -0.119567 |
| H | 2.260932  | 1.364970 | 0.115943  |
| C | 2.874710  | 2.305566 | 1.963446  |
| H | 3.791805  | 1.706206 | 2.055626  |
| H | 2.081342  | 1.812259 | 2.542611  |
| H | 3.055976  | 3.304186 | 2.391144  |

**Supplementary Table 4.** Cartesian geometry of **4** at B97-D/6-31G(d)[Al: cc-pVTZ, Te: cc-pVTZ-PP] level of theory in [Å].

|    |           |           |           |
|----|-----------|-----------|-----------|
| C  | 4.237839  | 1.722880  | -0.152963 |
| C  | 3.633669  | 0.454105  | -0.329176 |
| C  | 3.792768  | -0.314185 | -1.509047 |
| C  | 4.611092  | 0.223258  | -2.520596 |
| C  | 5.241074  | 1.464355  | -2.362273 |
| C  | 5.053726  | 2.209041  | -1.190811 |
| N  | 2.824401  | -0.065320 | 0.733413  |
| C  | 1.427083  | -0.172954 | 0.671670  |
| N  | 1.088996  | -0.771384 | 1.905168  |
| C  | 2.239513  | -1.028393 | 2.658526  |
| C  | 3.306309  | -0.585487 | 1.940823  |
| N  | 0.650678  | 0.213388  | -0.270943 |
| Al | -0.913740 | -0.319552 | -0.956090 |
| Te | -1.710541 | -2.188371 | -2.286260 |
| C  | -0.252616 | -1.139234 | 2.231898  |
| C  | -0.626141 | -2.502308 | 2.156434  |
| C  | -1.960403 | -2.833544 | 2.461422  |
| C  | -2.888211 | -1.843651 | 2.799154  |
| C  | -2.499550 | -0.496190 | 2.850897  |
| C  | -1.175088 | -0.113568 | 2.575612  |
| C  | 0.378071  | -3.592778 | 1.788342  |
| C  | -0.185251 | -4.614694 | 0.777656  |
| C  | -0.716809 | 1.344195  | 2.666237  |
| C  | -1.873651 | 2.362531  | 2.684840  |
| C  | 3.112438  | -1.676646 | -1.664930 |
| C  | 3.836585  | -2.755824 | -0.822854 |
| C  | 3.939339  | 2.559895  | 1.093924  |
| C  | 2.537286  | 3.205129  | 0.963982  |
| C  | -2.172351 | 1.280888  | -0.705582 |
| N  | -3.505424 | 1.261945  | -0.416694 |
| C  | -4.024362 | 2.554168  | -0.336835 |
| C  | -2.977234 | 3.409443  | -0.592897 |
| N  | -1.859332 | 2.606301  | -0.803626 |
| C  | -4.311942 | 0.034809  | -0.257346 |
| C  | -5.120755 | -0.274440 | -1.522255 |
| C  | -5.443372 | 2.848292  | 0.038319  |
| C  | -2.924984 | 4.904814  | -0.617332 |
| C  | -0.525655 | 3.101533  | -1.191017 |
| C  | -0.379114 | 3.173718  | -2.717203 |
| C  | 0.865969  | -4.313725 | 3.068677  |
| C  | 0.179033  | 1.570893  | 3.909060  |
| C  | 2.990922  | -2.146087 | -3.128112 |
| C  | 4.997593  | 3.640408  | 1.393437  |
| H  | 2.182251  | -1.497064 | 3.632985  |

|   |           |           |           |
|---|-----------|-----------|-----------|
| H | 4.367421  | -0.597474 | 2.158499  |
| H | -2.275635 | -3.875787 | 2.404034  |
| H | -3.923078 | -2.118876 | 3.015518  |
| H | -3.236548 | 0.264009  | 3.110806  |
| H | 1.248534  | -3.112459 | 1.318860  |
| H | -0.556021 | -4.109388 | -0.127681 |
| H | -1.007338 | -5.203208 | 1.217864  |
| H | 0.613668  | -5.319427 | 0.493386  |
| H | 1.321905  | -3.610600 | 3.784179  |
| H | 1.613535  | -5.081463 | 2.809116  |
| H | 0.020235  | -4.811117 | 3.572359  |
| H | -0.115553 | 1.548733  | 1.768734  |
| H | -2.567924 | 2.208896  | 1.847963  |
| H | -1.461848 | 3.382067  | 2.613375  |
| H | -2.444638 | 2.298988  | 3.626748  |
| H | 0.522652  | 2.618901  | 3.935577  |
| H | 1.065076  | 0.921353  | 3.898688  |
| H | -0.392723 | 1.372297  | 4.831256  |
| H | 4.754726  | -0.336296 | -3.444849 |
| H | 5.876350  | 1.856811  | -3.159924 |
| H | 5.541093  | 3.178894  | -1.086539 |
| H | 2.085594  | -1.579166 | -1.286398 |
| H | 3.872545  | -2.485021 | 0.243051  |
| H | 4.870443  | -2.894975 | -1.182713 |
| H | 3.305082  | -3.717306 | -0.917931 |
| H | 2.534802  | -1.368446 | -3.759893 |
| H | 2.346025  | -3.036578 | -3.167370 |
| H | 3.975275  | -2.411329 | -3.551794 |
| H | 3.903049  | 1.885637  | 1.963540  |
| H | 2.280967  | 3.755264  | 1.885647  |
| H | 1.770210  | 2.440770  | 0.780812  |
| H | 2.526359  | 3.914708  | 0.118936  |
| H | 6.011643  | 3.211825  | 1.437374  |
| H | 4.775001  | 4.116992  | 2.361450  |
| H | 4.990753  | 4.430236  | 0.624162  |
| H | -5.598812 | 3.935271  | 0.088263  |
| H | -5.691939 | 2.423957  | 1.026276  |
| H | -6.158352 | 2.431309  | -0.688832 |
| H | -3.926902 | 5.318658  | -0.435969 |
| H | -2.569204 | 5.284682  | -1.589704 |
| H | -2.248657 | 5.298217  | 0.161183  |
| H | -4.957036 | 0.180226  | 0.622762  |
| H | -3.613263 | -0.788323 | -0.054349 |
| H | -5.731935 | -1.173670 | -1.348394 |
| H | -4.425201 | -0.488276 | -2.347450 |
| H | -5.788212 | 0.558752  | -1.794240 |
| H | 0.207449  | 2.403328  | -0.768608 |
| H | -0.390681 | 4.087402  | -0.724103 |

|   |           |          |           |
|---|-----------|----------|-----------|
| H | 0.628845  | 3.535542 | -2.973695 |
| H | -1.125068 | 3.851804 | -3.162324 |
| H | -0.510299 | 2.171781 | -3.155283 |



**Supplementary Table 5.** Cartesian geometry of **5** at B97-D/6-31G(d)[Al: cc-pVTZ, Te: cc-pVTZ-PP] level of theory in [Å].

|    |           |           |           |
|----|-----------|-----------|-----------|
| C  | 2.538000  | 3.635884  | 1.928828  |
| C  | 3.057248  | 3.652662  | 0.609813  |
| C  | 2.503691  | 4.461942  | -0.409341 |
| C  | 1.479817  | 5.360607  | -0.051518 |
| C  | 0.975149  | 5.389508  | 1.252720  |
| C  | 1.482656  | 4.515055  | 2.225460  |
| N  | 4.157017  | 2.797346  | 0.280530  |
| C  | 3.967702  | 1.428271  | -0.058619 |
| N  | 5.209543  | 1.089149  | -0.682978 |
| C  | 6.074003  | 2.194176  | -0.689939 |
| C  | 5.425822  | 3.237869  | -0.107692 |
| N  | 2.950279  | 0.720146  | 0.150108  |
| Al | 1.629080  | -0.475368 | 0.270454  |
| Te | -0.035509 | -0.252248 | -1.762052 |
| C  | 5.476641  | -0.158993 | -1.323637 |
| C  | 4.810979  | -0.486821 | -2.540171 |
| C  | 5.115056  | -1.725047 | -3.133510 |
| C  | 6.048910  | -2.602649 | -2.562508 |
| C  | 6.695684  | -2.256404 | -1.373042 |
| C  | 6.416376  | -1.035143 | -0.729376 |
| C  | 3.870385  | 0.506211  | -3.226933 |
| C  | 2.963634  | -0.131794 | -4.295519 |
| C  | 7.144187  | -0.672007 | 0.564041  |
| C  | 7.086141  | -1.814407 | 1.596145  |
| C  | 2.987983  | 4.383193  | -1.858420 |
| C  | 3.692953  | 5.688606  | -2.286120 |
| C  | 3.138627  | 2.703716  | 2.979657  |
| C  | 2.209899  | 2.459506  | 4.184500  |
| C  | 2.672741  | -2.261739 | 0.502237  |
| N  | 2.967625  | -3.230609 | -0.405350 |
| C  | 3.804951  | -4.207247 | 0.132823  |
| C  | 4.056934  | -3.827454 | 1.428344  |
| N  | 3.361398  | -2.630126 | 1.625357  |
| C  | 2.409703  | -3.294572 | -1.761281 |
| C  | 1.160779  | -4.183530 | -1.788295 |
| C  | 4.334881  | -5.356126 | -0.664011 |
| C  | 4.869564  | -4.514253 | 2.483713  |
| C  | 3.405416  | -1.846497 | 2.873685  |
| C  | 2.606031  | -2.503942 | 4.004938  |
| C  | 4.679632  | 1.651212  | -3.889640 |
| C  | 8.614075  | -0.283077 | 0.279530  |
| C  | 1.823686  | 4.042213  | -2.816863 |
| C  | 4.510060  | 3.247211  | 3.449117  |
| H  | 7.070689  | 2.120868  | -1.107278 |

|   |          |           |           |
|---|----------|-----------|-----------|
| H | 5.740840 | 4.261209  | 0.059988  |
| H | 4.623973 | -2.002348 | -4.066676 |
| H | 6.282097 | -3.548966 | -3.057835 |
| H | 7.427558 | -2.936501 | -0.933405 |
| H | 3.214278 | 0.937410  | -2.457468 |
| H | 2.407355 | -0.995358 | -3.904089 |
| H | 3.547869 | -0.454489 | -5.174833 |
| H | 2.226882 | 0.613289  | -4.630053 |
| H | 5.307039 | 2.192126  | -3.168292 |
| H | 3.987007 | 2.373236  | -4.351134 |
| H | 5.330994 | 1.245070  | -4.682617 |
| H | 6.638632 | 0.200067  | 1.003319  |
| H | 6.050496 | -2.145297 | 1.725958  |
| H | 7.484926 | -1.473021 | 2.565655  |
| H | 7.681915 | -2.684388 | 1.274001  |
| H | 9.127287 | -0.006765 | 1.215962  |
| H | 8.674751 | 0.569652  | -0.413357 |
| H | 9.153640 | -1.131371 | -0.173970 |
| H | 1.074258 | 6.031683  | -0.812599 |
| H | 0.168559 | 6.077950  | 1.514566  |
| H | 1.049071 | 4.516158  | 3.225904  |
| H | 3.714131 | 3.564836  | -1.935459 |
| H | 4.546579 | 5.911719  | -1.626895 |
| H | 2.995780 | 6.542579  | -2.243956 |
| H | 4.064203 | 5.597930  | -3.320451 |
| H | 1.371130 | 3.076691  | -2.546784 |
| H | 2.191286 | 3.987303  | -3.854276 |
| H | 1.038312 | 4.813906  | -2.778310 |
| H | 3.302822 | 1.728562  | 2.495674  |
| H | 2.655910 | 1.694388  | 4.840970  |
| H | 1.224523 | 2.096302  | 3.849072  |
| H | 2.078944 | 3.374737  | 4.787962  |
| H | 5.205119 | 3.364048  | 2.603745  |
| H | 4.961753 | 2.551632  | 4.176697  |
| H | 4.386119 | 4.228081  | 3.939965  |
| H | 5.008775 | -5.962678 | -0.042049 |
| H | 4.904438 | -4.990819 | -1.535581 |
| H | 3.530097 | -6.011180 | -1.036924 |
| H | 5.566860 | -5.222123 | 2.012264  |
| H | 4.236499 | -5.078595 | 3.189735  |
| H | 5.463776 | -3.799663 | 3.072862  |
| H | 3.208127 | -3.644034 | -2.430032 |
| H | 2.138134 | -2.274886 | -2.052552 |
| H | 0.772332 | -4.265225 | -2.815472 |
| H | 0.383283 | -3.723284 | -1.160888 |
| H | 1.376236 | -5.196513 | -1.410375 |
| H | 3.014175 | -0.846984 | 2.646531  |
| H | 4.463151 | -1.736055 | 3.155977  |

|    |           |           |           |
|----|-----------|-----------|-----------|
| H  | 2.659672  | -1.868623 | 4.903222  |
| H  | 3.009057  | -3.497459 | 4.255218  |
| H  | 1.550688  | -2.596824 | 3.710436  |
| Te | -0.014665 | -0.432233 | 2.327183  |
| Al | -1.610851 | 0.163916  | 0.319694  |
| N  | -3.251938 | -0.505248 | 0.125391  |
| C  | -2.106873 | 2.138398  | 0.747582  |
| N  | -2.865920 | 2.535969  | 1.815839  |
| C  | -3.104687 | 3.911838  | 1.786606  |
| C  | -2.502041 | 4.380908  | 0.645447  |
| N  | -1.896391 | 3.279740  | 0.042668  |
| C  | -1.180759 | 3.334463  | -1.240324 |
| C  | -2.441327 | 5.762516  | 0.073501  |
| C  | -3.869973 | 4.645730  | 2.842857  |
| C  | -3.382880 | 1.637776  | 2.861514  |
| H  | -3.277792 | 0.612249  | 2.489690  |
| C  | -2.653886 | 1.819240  | 4.199125  |
| H  | -4.461498 | 1.843450  | 2.961795  |
| H  | -0.347563 | 2.623254  | -1.181995 |
| C  | -2.109976 | 2.992760  | -2.409724 |
| H  | -0.763602 | 4.343066  | -1.335033 |
| H  | -3.098589 | 6.433425  | 0.645188  |
| H  | -1.418414 | 6.174706  | 0.110387  |
| H  | -2.767036 | 5.776687  | -0.980064 |
| H  | -4.133391 | 5.650248  | 2.480380  |
| H  | -4.805164 | 4.122768  | 3.097184  |
| H  | -3.286276 | 4.761787  | 3.772027  |
| H  | -3.013732 | 1.067863  | 4.918654  |
| H  | -1.574322 | 1.669469  | 4.052684  |
| H  | -2.831568 | 2.820365  | 4.622116  |
| H  | -1.556889 | 3.087694  | -3.357708 |
| H  | -2.467320 | 1.958637  | -2.320896 |
| H  | -2.989613 | 3.654523  | -2.433516 |
| C  | -4.303099 | -1.174641 | -0.055120 |
| N  | -4.639331 | -2.479417 | 0.401198  |
| C  | -5.909737 | -2.847391 | -0.060744 |
| C  | -6.410774 | -1.811911 | -0.785891 |
| N  | -5.444236 | -0.801157 | -0.809764 |
| C  | -5.492857 | 0.388692  | -1.596107 |
| H  | -7.366029 | -1.685611 | -1.281052 |
| H  | -6.338043 | -3.811556 | 0.186646  |
| C  | -3.606525 | -3.383266 | 0.808854  |
| C  | -4.893638 | 0.388084  | -2.879409 |
| C  | -5.033315 | 1.548267  | -3.662756 |
| C  | -5.710285 | 2.673540  | -3.171913 |
| C  | -6.233162 | 2.672416  | -1.872003 |
| C  | -6.122536 | 1.531330  | -1.055266 |
| C  | -4.113698 | -0.829931 | -3.379480 |

|   |           |           |           |
|---|-----------|-----------|-----------|
| H | -4.588348 | 1.579602  | -4.657676 |
| H | -5.810263 | 3.563261  | -3.798671 |
| H | -6.722831 | 3.567491  | -1.485175 |
| C | -6.654048 | 1.506992  | 0.377211  |
| C | -3.181410 | -3.375534 | 2.159154  |
| C | -2.133095 | -4.237530 | 2.521331  |
| C | -1.535925 | -5.081635 | 1.573925  |
| C | -1.963514 | -5.062260 | 0.241512  |
| C | -2.992091 | -4.195507 | -0.174767 |
| C | -3.868684 | -2.458287 | 3.169053  |
| H | -1.764431 | -4.238972 | 3.547223  |
| H | -0.718268 | -5.741721 | 1.873562  |
| H | -1.485228 | -5.714913 | -0.492290 |
| C | -3.426363 | -4.159613 | -1.640272 |
| H | -3.623380 | -1.285803 | -2.507311 |
| C | -5.060858 | -1.877259 | -4.010886 |
| C | -2.995737 | -0.469708 | -4.378981 |
| H | -4.478756 | -2.747867 | -4.358193 |
| H | -5.813080 | -2.232525 | -3.290356 |
| H | -5.582342 | -1.441980 | -4.880344 |
| H | -2.398600 | -1.369570 | -4.591595 |
| H | -3.410440 | -0.103508 | -5.333979 |
| H | -2.319839 | 0.293657  | -3.969098 |
| H | -6.043138 | 0.782419  | 0.936841  |
| C | -6.519109 | 2.871112  | 1.088326  |
| C | -8.120071 | 1.019131  | 0.413495  |
| H | -6.726008 | 2.749683  | 2.164830  |
| H | -5.505038 | 3.278561  | 0.963826  |
| H | -7.239322 | 3.608140  | 0.696134  |
| H | -8.497471 | 1.001447  | 1.450290  |
| H | -8.761898 | 1.692858  | -0.179025 |
| H | -8.205566 | 0.004567  | -0.002528 |
| H | -4.026928 | -1.491585 | 2.665669  |
| C | -5.256970 | -3.025605 | 3.557357  |
| C | -3.037444 | -2.199179 | 4.438383  |
| H | -5.752891 | -2.355179 | 4.280541  |
| H | -5.909437 | -3.128233 | 2.678479  |
| H | -5.144094 | -4.016385 | 4.029067  |
| H | -3.537573 | -1.433009 | 5.052965  |
| H | -2.954476 | -3.112875 | 5.052574  |
| H | -2.024758 | -1.850507 | 4.185511  |
| H | -4.064084 | -3.280817 | -1.797065 |
| C | -2.233536 | -4.012210 | -2.609377 |
| C | -4.266424 | -5.409439 | -1.987891 |
| H | -4.603206 | -5.362623 | -3.037323 |
| H | -3.667076 | -6.326113 | -1.855551 |
| H | -5.154066 | -5.482761 | -1.339753 |
| H | -2.609559 | -3.953292 | -3.645068 |

|   |           |           |           |
|---|-----------|-----------|-----------|
| H | -1.662637 | -3.096099 | -2.394389 |
| H | -1.550523 | -4.875536 | -2.551046 |

**Supplementary Table 6. Crystallographic data to 2.**

|                                   |                                                              |                                               |
|-----------------------------------|--------------------------------------------------------------|-----------------------------------------------|
| Empirical formula                 | $C_{54}H_{72}Al_2N_6Te_2$                                    | (the two Al-bond H atoms were not identified) |
| Formula weight                    | 1114.34                                                      |                                               |
| Temperature                       | 150.00(10) K                                                 |                                               |
| Wavelength                        | 1.54184 Å                                                    |                                               |
| Crystal system                    | Monoclinic                                                   |                                               |
| Space group                       | $P2_1/n$                                                     |                                               |
| Unit cell dimensions              | $a = 12.4329(2)$ Å                                           | $\alpha = 90^\circ$ .                         |
|                                   | $b = 22.9150(4)$ Å                                           | $\beta = 92.861(2)^\circ$ .                   |
|                                   | $c = 19.4190(5)$ Å                                           | $\gamma = 90^\circ$ .                         |
| Volume                            | $5525.58(19)$ Å <sup>3</sup>                                 |                                               |
| Z                                 | 4                                                            |                                               |
| Density (calculated)              | 1.340 Mg/m <sup>3</sup>                                      |                                               |
| Absorption coefficient            | 8.932 mm <sup>-1</sup>                                       |                                               |
| F(000)                            | 2272                                                         |                                               |
| Crystal colour, shape             | blue, plate                                                  |                                               |
| Crystal size                      | 0.34 x 0.09 x 0.05 mm <sup>3</sup>                           |                                               |
| Theta range for data collection   | 2.99 to 67.50°.                                              |                                               |
| Index ranges                      | $-14 \leq h \leq 14, -26 \leq k \leq 27, -22 \leq l \leq 23$ |                                               |
| Reflections collected             | 35751                                                        |                                               |
| Independent reflections           | 9958 [R(int) = 0.0805]                                       |                                               |
| Completeness to theta = 67.50°    | 100.0 %                                                      |                                               |
| Absorption correction             | Semi-empirical from equivalents                              |                                               |
| Max. and min. transmission        | 0.6841 and 0.1522                                            |                                               |
| Refinement method                 | Full-matrix least-squares on F <sup>2</sup>                  |                                               |
| Data / restraints / parameters    | 9958 / 6 / 593                                               |                                               |
| Goodness-of-fit on F <sup>2</sup> | 1.059                                                        |                                               |
| Final R indices [I > 2sigma(I)]   | R1 = 0.1777, wR2 = 0.4134                                    |                                               |
| R indices (all data)              | R1 = 0.1839, wR2 = 0.4164                                    |                                               |
| Largest diff. peak and hole       | 11.807 and -2.448 e.Å <sup>-3</sup>                          |                                               |

**Supplementary Table 7.** Crystallographic data to **3**.

|                                   |                                                     |                 |
|-----------------------------------|-----------------------------------------------------|-----------------|
| Empirical formula                 | C <sub>45</sub> H <sub>68</sub> AlN <sub>7</sub> Te |                 |
| Formula weight                    | 861.64                                              |                 |
| Temperature                       | 150.00(10) K                                        |                 |
| Wavelength                        | 1.54184 Å                                           |                 |
| Crystal system                    | Monoclinic                                          |                 |
| Space group                       | <i>P</i> 2 <sub>1</sub> / <i>c</i>                  |                 |
| Unit cell dimensions              | a = 12.2033(4) Å                                    | α = 90°.        |
|                                   | b = 19.6490(7) Å                                    | β = 95.069(3)°. |
|                                   | c = 19.4970(6) Å                                    | γ = 90°.        |
| Volume                            | 4656.8(3) Å <sup>3</sup>                            |                 |
| Z                                 | 4                                                   |                 |
| Density (calculated)              | 1.229 Mg/m <sup>3</sup>                             |                 |
| Absorption coefficient            | 5.499 mm <sup>-1</sup>                              |                 |
| F(000)                            | 1808                                                |                 |
| Crystal colour, shape             | Yellow, plate                                       |                 |
| Crystal size                      | 0.36 x 0.21 x 0.09 mm <sup>3</sup>                  |                 |
| Theta range for data collection   | 3.20 to 67.49°.                                     |                 |
| Index ranges                      | -11<=h<=14, -23<=k<=23, -23<=l<=18                  |                 |
| Reflections collected             | 16375                                               |                 |
| Independent reflections           | 8090 [R(int) = 0.0506]                              |                 |
| Completeness to theta = 67.49°    | 96.2 %                                              |                 |
| Absorption correction             | Semi-empirical from equivalents                     |                 |
| Max. and min. transmission        | 0.6374 and 0.2422                                   |                 |
| Refinement method                 | Full-matrix least-squares on F <sup>2</sup>         |                 |
| Data / restraints / parameters    | 8090 / 0 / 503                                      |                 |
| Goodness-of-fit on F <sup>2</sup> | 1.064                                               |                 |
| Final R indices [I>2sigma(I)]     | R1 = 0.0529, wR2 = 0.1348                           |                 |
| R indices (all data)              | R1 = 0.0717, wR2 = 0.1709                           |                 |
| Largest diff. peak and hole       | 2.328 and -1.509 e.Å <sup>-3</sup>                  |                 |

**Supplementary Table 8. Crystallographic data to 5.**

|                                   |                                             |                               |
|-----------------------------------|---------------------------------------------|-------------------------------|
| Empirical formula                 | $C_{72}H_{104}Al_2N_{10}Te_2$               |                               |
| Formula weight                    | 1418.81                                     |                               |
| Temperature                       | 150.00(10) K                                |                               |
| Wavelength                        | 1.54184 Å                                   |                               |
| Crystal system                    | Triclinic                                   |                               |
| Space group                       | <i>P</i> -1                                 |                               |
| Unit cell dimensions              | $a = 10.4285(6)$ Å                          | $\alpha = 107.012(5)^\circ$ . |
|                                   | $b = 12.9619(8)$ Å                          | $\beta = 101.576(5)^\circ$ .  |
|                                   | $c = 15.2266(7)$ Å                          | $\gamma = 104.722(5)^\circ$ . |
| Volume                            | 1817.43(18) Å <sup>3</sup>                  |                               |
| Z                                 | 1                                           |                               |
| Density (calculated)              | 1.296 Mg/m <sup>3</sup>                     |                               |
| Absorption coefficient            | 6.917 mm <sup>-1</sup>                      |                               |
| F(000)                            | 736                                         |                               |
| Crystal colour, shape             | Colourless, rod                             |                               |
| Crystal size                      | 0.23 x 0.19 x 0.13 mm <sup>3</sup>          |                               |
| Theta range for data collection   | 3.18 to 67.50°.                             |                               |
| Index ranges                      | -11<=h<=12, -15<=k<=15, -18<=l<=13          |                               |
| Reflections collected             | 11605                                       |                               |
| Independent reflections           | 6533 [R(int) = 0.0879]                      |                               |
| Completeness to theta = 67.50°    | 99.5 %                                      |                               |
| Absorption correction             | Semi-empirical from equivalents             |                               |
| Max. and min. transmission        | 0.4621 and 0.2991                           |                               |
| Refinement method                 | Full-matrix least-squares on F <sup>2</sup> |                               |
| Data / restraints / parameters    | 6533 / 0 / 400                              |                               |
| Goodness-of-fit on F <sup>2</sup> | 1.084                                       |                               |
| Final R indices [I>2sigma(I)]     | R1 = 0.0584, wR2 = 0.1504                   |                               |
| R indices (all data)              | R1 = 0.0658, wR2 = 0.1618                   |                               |
| Largest diff. peak and hole       | 1.846 and -1.627 e.Å <sup>-3</sup>          |                               |



## Supplementary Methods

### NMR-spectroscopic characterization of $L^{Et}(H_2)$ .<sup>1</sup>

<sup>1</sup>H NMR (500.1 MHz, C<sub>6</sub>D<sub>6</sub>):  $\delta$  = 3.83 (s, 2 H, NCH<sub>2</sub>N), 2.57 (q,  $J_{HH}$  = 7 Hz, 4 H, CH<sub>2</sub>CH<sub>3</sub>), 1.57 (s, 6 H, CCH<sub>3</sub>), 0.98 (t,  $J_{HH}$  = 7 Hz, 6 H, CH<sub>2</sub>CH<sub>3</sub>); <sup>13</sup>C{<sup>1</sup>H} NMR (125.8 MHz, C<sub>6</sub>D<sub>6</sub>):  $\delta$  = 123.0 (CCH<sub>3</sub>), 76.5 (NCH<sub>2</sub>N), 46.0 (CH<sub>2</sub>CH<sub>3</sub>), 13.8 (CH<sub>2</sub>CH<sub>3</sub>), 10.3 (CCH<sub>3</sub>).

### Crystallographic Methods

Data for the single crystal structure determination of **2**, **3** and **5** were collected on an Agilent SuperNova diffractometer, equipped with a CCD area Atlas detector and a mirror monochromator utilizing CuK $\alpha$  radiation ( $\lambda$  = 1.54184 Å).

The crystal structures were solved by Direct Methods and refined on  $F^2$  using full-matrix least squares with SHELXL-97 (G. M. Sheldrick, SHELXL-97, *Program for refinement of crystal structures*, University of Göttingen, Germany, 1997). The positions of the H atoms at the carbon atoms were calculated by standard methods.

### Supplementary Reference

1. Sindlinger, P. C., Wesemann, L. Hydrogen abstraction from organotin di- and trihydrides by *N*-heterocyclic carbenes: a new method for the preparation of NHC adducts to tin(II) species and observation of an isomer of a hexastannane derivative [R<sub>6</sub>Sn<sub>6</sub>]. *Chem. Sci.* **5**, 2739–2746 (2014).
